# Supplementary material for: Analysis of Immunological Characteristics and Genomic Alterations in HPV-Positive Oropharyngeal Squamous Cell Carcinoma Based on PD-L1 Expression
Source: Front Immunol. 2022 Jan 25;12:798424. doi: 10.3389/fimmu.2021.798424 (PMC8821172; doi:10.3389/fimmu.2021.798424)
Supplement: Supplementary Data Sheet 9 — Other cytokine expression and CPS. [file DataSheet_9.xlsx]

## Sheet: Sheet1
cps level	Sample	FAS	TGFBR3	CSF2RB	TGFBR1	CSF3	VEGFA	PDGFRB	TPO	FASLG	ARG1	TGFB3	IDO1	PDGFRA	EGF	PDGFC	EGFR	VEGFC	TGFBR2	CSF2	PDGFD	VEGFB	CSF1	EPOR	PDGFA	CSF2RA	LTA	TNF
1	1#	44.5751	5.25917	10.6321	56.2021	0.113712	83.7488	28.7975	0.170568	1.30769	0.028428	10.4046	8.95481	9.38123	0.198996	2.16053	105.923	1.16555	17.5685	0.14214	1.13712	21.8611	18.734	1.98996	1.39297	5.20232	0.710699	1.30769
1	2#	42.0674	6.90529	45.3611	30.6549	0.0288924	68.1861	51.4574	1.18459	9.9101	0.11557	21.6982	269.104	12.1348	3.8138	5.25842	156.539	1.73355	57.7849	0.808988	2.83146	45.7656	49.4638	1.82022	18.4623	15.3997	6.06741	9.18779
1	3#	23.9298	35.3882	7.05668	45.4842	0.908286	150.217	63.2656	4.54143	0.314407	2.79473	12.6112	1.15282	44.4361	8.17457	12.4365	212.783	1.99124	69.4839	0.104802	6.70734	36.9952	21.7639	2.68992	8.31431	3.42354	0.139736	3.42354
1	4#	18.4101	10.3912	12.3625	66.5904	2.7398	491.927	54.8293	0.233885	0.801892	0.0334122	8.68716	2.33885	9.22175	0.100236	2.80662	179.557	2.53932	22.4864	0.0334122	5.88054	25.3932	13.1644	2.10497	8.05233	3.17415	0.400946	2.33885
1	5#	14.8844	12.5615	25.3486	137.59	3.47302	130.892	94.2678	3.85641	0.789324	0.248073	15.9669	2.39052	48.0811	22.0785	28.2127	256.057	4.57808	55.7037	3.49558	3.96917	20.2292	14.3206	2.75136	12.2232	4.8487	0.451042	2.95433
1	6#	15.836	182.889	15.7499	48.3687	0.258196	150.959	156.122	11.9631	0.946718	0.344261	35.545	0.258196	176.606	64.549	29.6065	120.836	7.05735	224.372	0	20.2253	101.041	35.8032	5.33605	19.3647	3.27048	0.774588	1.29098
2	7#	23.0344	125.165	40.2041	38.6607	106.452	188.172	371.869	40.4742	0.578754	0.347252	72.7686	7.87105	349.49	12.694	24.9636	152.83	9.41439	474.424	0.308669	67.3669	83.4949	103.211	8.2183	17.324	11.7294	0.733088	9.14431
2	8#	5.74046	84.5234	5.81964	34.2052	2.89003	116.432	33.1759	7.40322	0.118768	0.158358	17.8152	0.356305	45.4486	52.6143	26.327	159.229	2.81085	145.768	0	11.9956	41.2522	23.7141	6.80938	12.1935	3.76099	0.0791788	0.0791788
2	9#	33.4063	17.0077	57.6995	56.0182	1.02339	137.134	105.872	0.511693	2.99706	0.53606	42.6411	30.3361	41.1548	1.43761	15.3508	1867.49	6.38398	96.7831	0.389862	4.65397	34.6246	48.3916	2.85086	7.77286	16.1305	2.65593	4.53214
2	10#	24.9336	13.6498	33.078	56.7377	1.45598	92.6367	112.656	3.13945	1.41048	0.136498	51.5963	1.63798	162.842	59.6951	26.1166	24.7971	6.59741	138.955	0.363995	11.3748	57.1017	43.5429	3.91294	28.8466	7.96239	0.636991	0.636991
2	11#	29.8251	17.8339	71.2132	37.442	0.581208	77.3006	87.9765	3.6402	5.41441	0	45.8542	130.863	44.7836	2.69191	8.77929	143.589	5.04733	90.8825	0.672977	4.80261	26.4908	31.2323	2.87545	6.24034	12.4807	2.56955	5.20028
2	12#	43.9258	2.11556	10.4108	52.4159	0	77.3295	36.7162	0.222691	2.1434	0.111346	23.7166	25.3311	9.54788	2.58878	7.8777	346.563	1.30831	44.399	0.111346	1.25264	26.2219	24.0785	1.11346	3.08984	7.15395	2.50527	1.97638
2	13#	31.7676	8.50864	32.1713	62.79	0	150.299	59.7468	0.279481	3.75746	0	23.1037	100.427	24.8117	0.0310534	6.67649	205.636	2.2669	53.4119	0.124214	4.68907	26.178	26.4575	2.54638	5.8691	15.8683	1.67688	2.63954
2	14#	124.029	0.76865	78.8327	54.0822	8.97783	42.9829	52.6679	0.0922379	2.52117	0.061492	35.3886	28.8705	50.5464	0.30746	14.5121	350.689	2.05998	36.7722	5.31906	1.84476	42.7062	47.9637	3.0746	6.11845	13.8049	3.19758	6.61039
2	15#	33.2887	23.9094	15.5296	83.542	1.20444	174.464	64.4504	3.25455	0.589407	0.0768791	27.1127	2.28075	82.4401	6.97038	5.38154	161.779	2.56264	70.8313	0	4.20273	36.3638	25.8058	1.23007	8.55921	3.28018	0.179385	1.30695
2	16#	97.8788	4.62488	249.075	42.5838	0	186.566	23.6189	0.174524	6.10833	0.116349	40.7222	49.4775	32.1415	0.0290873	3.25778	234.036	2.76329	59.0763	0.407222	2.5306	35.9519	53.957	2.93782	8.52258	27.2257	7.76631	11.5186
2	17#	57.3704	7.45843	49.7134	59.9227	0.170154	64.0064	79.3203	1.106	3.48816	0.0567181	61.1988	85.9563	47.7283	1.78662	14.0944	98.1507	7.31663	100.107	0.794053	8.70623	30.0322	30.3725	2.15529	14.0944	23.8216	6.32407	4.59417
2	18#	76.0602	25.7523	247.586	13.5264	0	500.062	35.1687	0.0520248	0.0520248	0.156074	13.2663	0.260124	4.00591	2.13302	22.0585	328.016	2.02897	15.6595	0.0520248	2.02897	40.9435	4.10996	2.44516	3.58971	1.92492	0.884421	2.96541
2	19#	64.4701	13.9906	82.1474	53.41	0.283593	70.9455	86.6849	1.13437	6.23904	0.141796	24.1054	33.6058	16.8738	0	9.68942	218.792	9.1695	136.692	0.189062	9.73669	31.1952	62.8631	4.25389	16.2593	20.1824	8.98044	10.1621
3	20#	53.0474	4.18863	151.48	30.7507	0.127702	179.472	92.3286	0.536349	14.0217	0.0255404	29.1927	58.2066	45.4875	0	8.42834	225.445	2.93715	46.9944	0.383106	2.93715	44.3126	69.0868	2.88607	23.8292	16.0905	3.88214	10.7525
3	21#	33.4085	91.2178	148.951	40.0598	12.2384	108.207	219.987	5.24502	0.798156	3.45867	23.7166	1.63432	109.461	2.39447	16.7613	203.074	8.47565	245.072	0.342067	13.3026	38.3495	90.8377	5.92916	12.5424	18.0915	0.684133	33.6366
3	22#	11.173	4.3049	31.3173	75.155	0.427204	348.861	141.996	0.262895	2.39891	0.0985855	50.0486	126.157	40.9459	0.131447	11.4359	325.267	6.73668	57.2125	0.230033	1.70882	29.9043	49.4242	1.67595	32.106	15.1164	1.28161	3.48336
3	23#	25.1473	2.08403	18.8952	36.0676	3.50117	156.052	147.577	0.27787	2.86206	0.0833611	37.9571	17.8948	25.6196	0	9.91997	132.433	4.25142	32.8443	0.305657	4.19584	46.8489	31.5661	2.08403	12.4764	5.91864	1.66722	2.22296
3	24#	56.3271	32.641	106.023	64.1199	1.16209	55.1308	134.495	4.75089	9.36506	0.37597	47.0987	17.8756	72.152	2.73432	13.6033	209.278	5.94715	152.336	0.71776	12.6462	33.2904	64.3591	3.89641	8.95491	25.8735	5.50283	11.6551
3	25#	78.2568	8.86826	34.5195	45.6127	0.222501	76.1272	66.4007	0.254287	14.1765	0.0317859	21.8051	87.5383	15.5115	0.158929	14.4944	211.789	2.06608	47.7424	0.254287	2.82894	33.5023	75.8729	3.5918	3.75073	12.7779	2.54287	2.57466
3	26#	2.74014	7.92891	23.4952	88.6755	9.18237	582.687	7.66655	0.174902	1.63242	0.174902	3.61465	133.625	1.69072	0.145752	12.7387	433	3.73125	23.845	2.15713	1.07856	15.5955	25.2151	1.19517	7.11269	4.43086	0.378955	2.33203
3	27#	33.0075	6.80675	14.158	108.95	2.86931	250.279	33.6149	0.104719	2.0525	0.0628315	8.14716	14.4513	4.18877	0.628315	5.1103	217.439	2.70176	28.1066	0.0628315	3.45573	18.5144	17.3624	2.34571	2.32477	6.19938	1.02625	2.63892
3	28#	41.8383	1.80552	43.1146	52.9516	0.0933891	44.5466	17.6817	0.124519	11.4557	0.0622594	25.2151	342.894	11.9227	0	8.49841	27.7366	1.96117	97.9652	1.96117	1.12067	47.2238	48.4378	3.17523	15.0045	46.4767	4.32703	4.38929
3	29#	17.5772	7.28463	90.0143	52.7317	0.634336	102.885	37.6713	1.08451	5.21792	0.204624	21.813	115.224	18.9073	0.0818497	3.72416	157.213	2.63965	78.146	0.532023	4.72682	24.7595	38.1215	1.73931	2.66012	18.5799	2.98752	5.68856
3	30#	45.7836	8.90377	152.528	39.9152	0.556486	85.3953	39.814	0.404717	3.64245	0.455307	24.0807	10.0673	13.7604	0	5.51427	92.4778	3.99658	110.134	0.202359	8.04375	36.2222	33.895	4.09776	3.74363	27.9255	18.1617	13.3557
3	31#	36.0148	6.17669	44.2346	57.6332	0.902747	195.658	35.5872	0.570156	3.6585	0.142539	18.7676	60.6741	30.6459	0.237565	5.41648	314.583	4.18114	61.5768	0.285078	2.37565	28.9829	48.5107	2.66073	11.5932	15.2042	2.89829	4.7513
3	32#	52.1052	3.75288	66.8448	93.4413	1.90364	160.504	75.3296	0	18.3837	0.108779	43.6748	524.479	43.6205	0.108779	16.5888	255.305	4.94945	79.1913	0.707065	1.63169	28.8809	64.2885	3.04582	9.46379	17.5135	2.88265	6.09164
